# Supplementary material for: A Study of the Interaction, Morphology, and Structure in Trypsin-Epigallocatechin-3-Gallate Complexes
Source: MDPI journal article supplement (doi:10.3390/molecules26154567), 2021-07-28
Supplement: s1 [file s1]

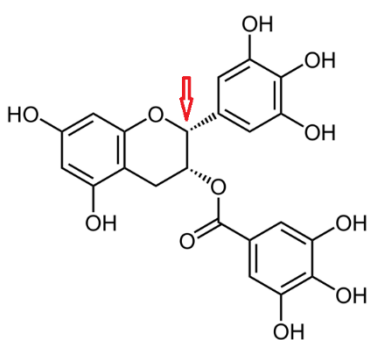

Figure S1. Chemical structure of Epigallocatechin-3-gallate. The red arrow indicates the position where the stereochemistry change occurs.
